# Supplementary material for: Follicle-stimulating hormone orchestrates glucose-stimulated insulin secretion of pancreatic islets
Source: Springer Nature journal article supplement (doi:10.1038/s41467-023-42801-6), 2023-11-01
Supplement: MOESM1 [file 41467_2023_42801_MOESM1_ESM.pdf]

1 Supplementary Fig. 1

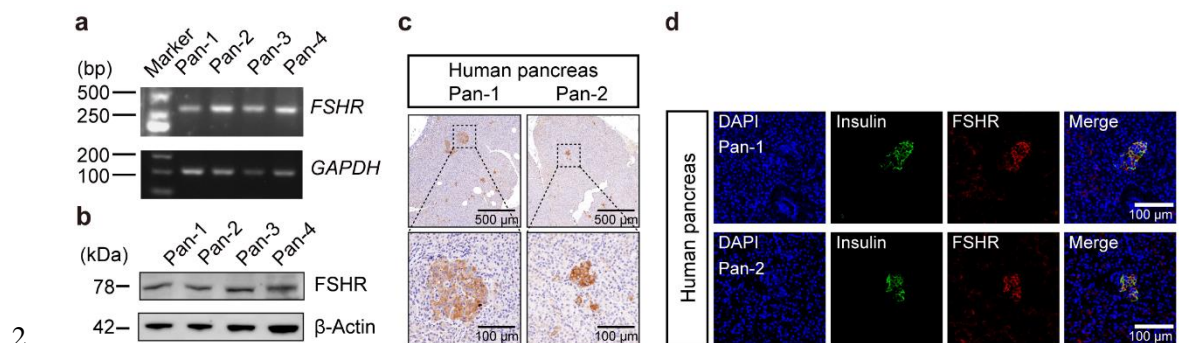

3 **Supplementary Figure 1. Expression of FSHR in human male pancreatic β-cells.**

4 (a) mRNA expression of FSHR in the pancreas of the human male. *GAPDH* served as  
5 a loading control. (b) Protein expression of FSHR in pancreas of the human male. β-  
6 Actin served as a loading control. Pan, pancreas. (c) Localization of FSHR in the human  
7 male pancreas by immunohistochemistry. Scale bars, 500 μm (main images), 100 μm  
8 (magnified images). (d) Localization of FSHR (red) in the human male pancreas by  
9 immunofluorescence, Insulin (green) was the marker of pancreatic β-cell, and nuclei  
10 (blue) were stained with DAPI. Scale bars, 100 μm. The experiments in a-d were  
11 performed twice independently. Source data are provided as a Source Data file.

12    Supplementary Fig. 2

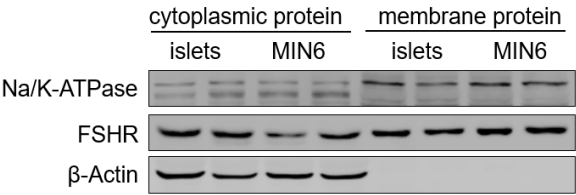

13

14    **Supplementary Figure 2. FSHR expressed in both the cell membrane and the**  
15    **cytoplasm.**

16    FSHR expression in cytoplasmic and membrane of cells from mouse pancreatic islets  
17    and MIN6 cells. The experiment was repeated 3 times with similar results.

18 Supplementary Fig. 3

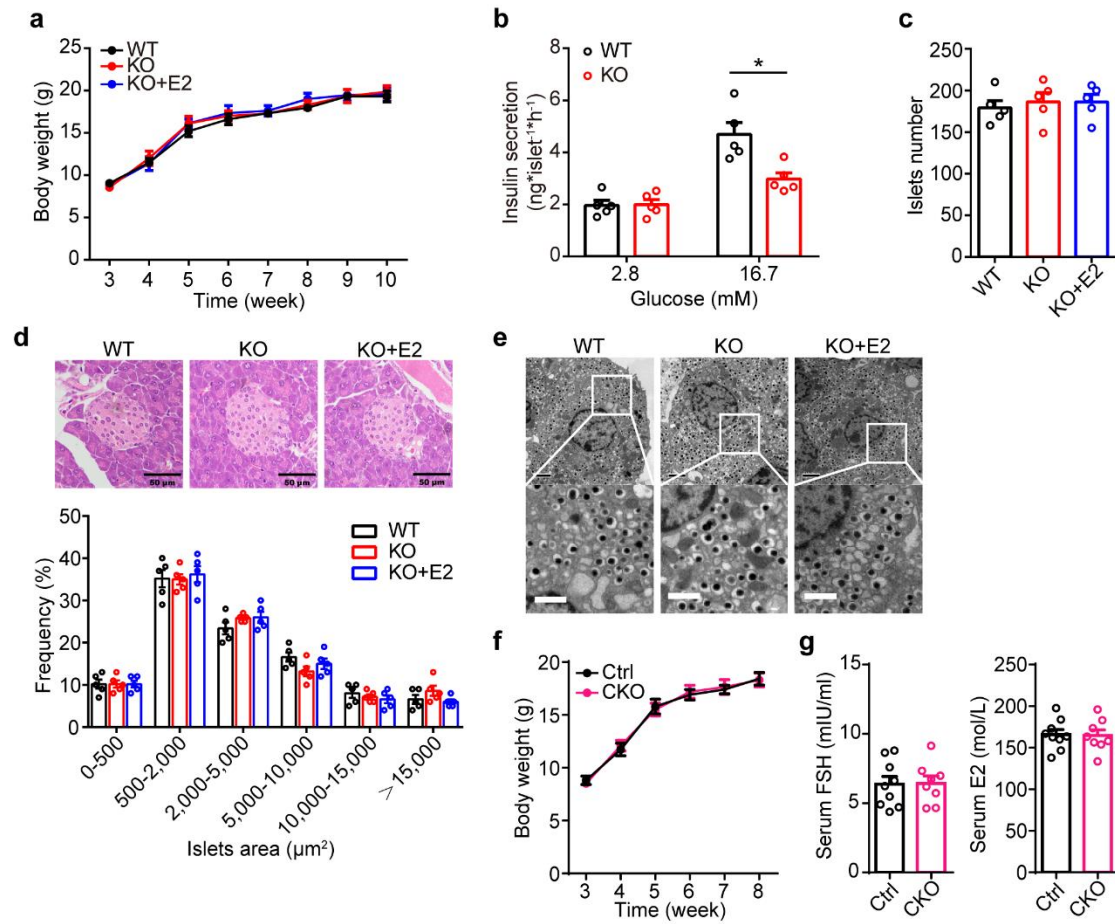

19

20 **Supplementary Figure 3. The number and morphology of pancreatic islets in**  
 21 **FSHR knockout mouse.**

22 (a) Body weight of the WT, KO, and KO+E2 female mice. (b) GSIS in isolated islets  
 23 from 10-week-old female WT and KO mice, n = 5 per group. (c) The number of  
 24 pancreatic islets in each group, n = 5 per group. (d) Hematoxylin and eosin (H&E)  
 25 staining in paraffin-embedded sections of the pancreas and the profiling of islet size  
 26 distribution. Scare bars, 50 μm. Shown are representative images from 5 mice per group  
 27 with similar results. (e) Electron microscopic images of pancreatic β-cells. Scare bars,  
 28 1 μm. (f) Body weight of the Ctrl, and CKO female mice. (g) Serum FSH and E<sub>2</sub> levels  
 29 of the Ctrl, and CKO female mice. Data were shown as mean ± s.e.m., analyzed by  
 30 unpaired two-tailed Student's *t*-tests (b, f, g) and one-way ANOVA (a, c, d), \**P* < 0.05.  
 31 Statistical details are in Supplementary Table 2. Source data are provided as a Source  
 32 Data file.

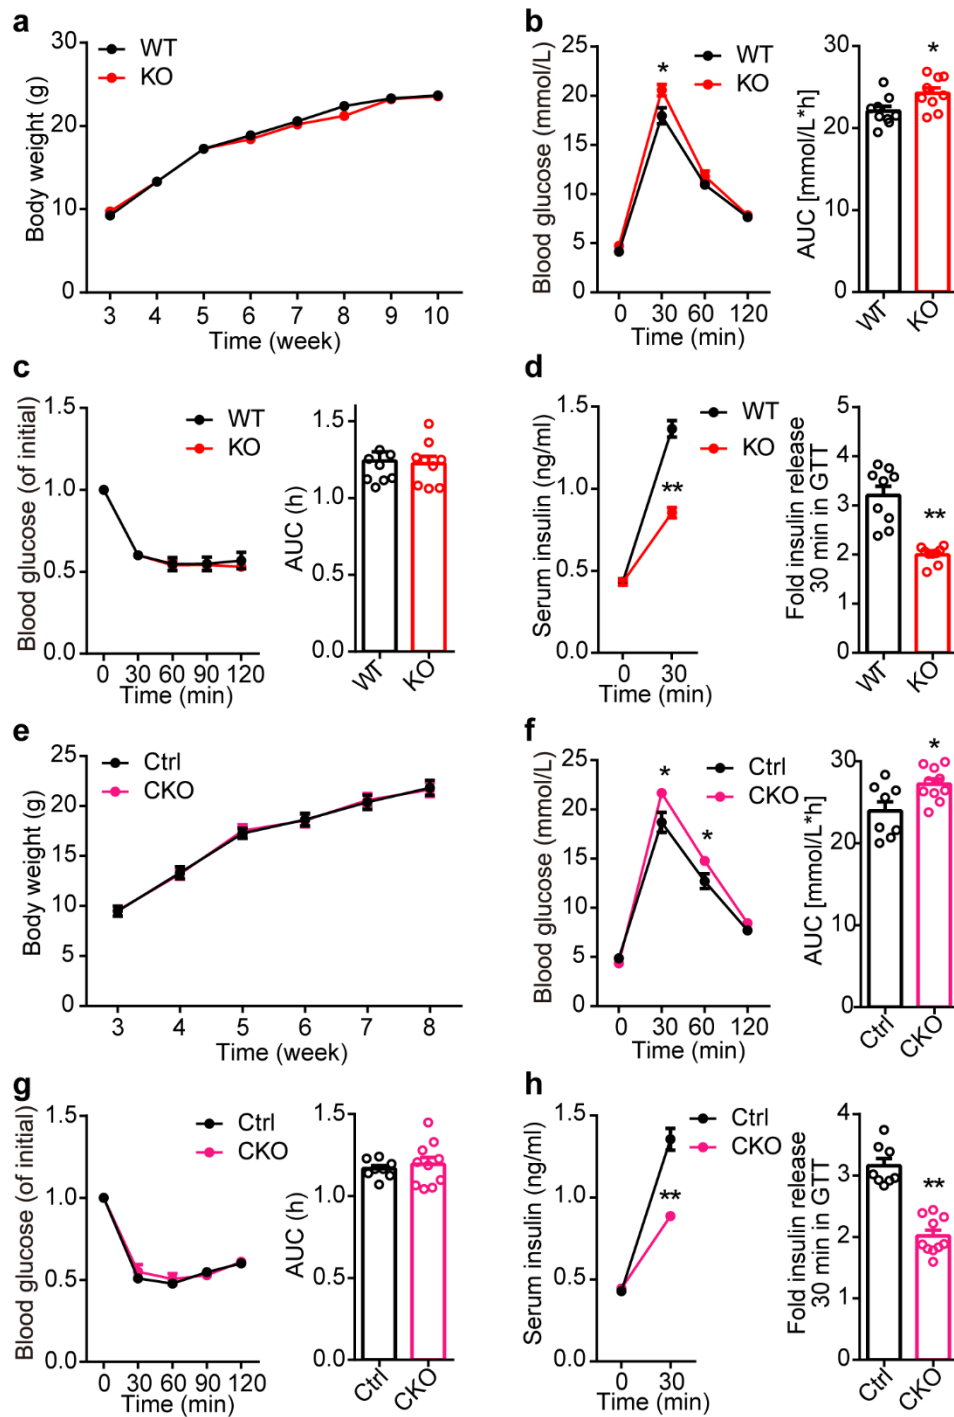

**Supplementary Figure 4. FSHR knockout lead to impaired glucose tolerance and insulin secretion in male mice.**

(a) Body weight of  $Fshr^{+/+}$  (WT) and  $Fshr^{-/-}$  (KO) male mice. (b) Glucose tolerance test and AUC of WT and KO male mice in different treatment groups.  $n_{WT} = 9$ ,  $n_{KO} = 9$ . \* $P < 0.05$ . (c) Insulin tolerance test and AUC of WT and KO male mice in different treatment groups.  $n_{WT} = 9$ ,  $n_{KO} = 9$ . (d) Blood insulin levels at 0 min and 30 min after

41 glucose injection and its fold changes of WT and KO male mice with different  
42 treatments.  $n_{WT} = 9$ ,  $n_{KO} = 9$ .  $**P < 0.01$ . All the WT and KO male mice were performed  
43 the serum and metabolic tests at 10 weeks of age. (e) Body weight of Ctrl (Fshr<sup>f/f</sup>) and  
44 CKO (Fshr<sup>f/f</sup>; Pdx1-Cre) male mice. (f) Glucose tolerance test and AUC of Ctrl and  
45 CKO male mice in different treatment groups.  $n_{Ctrl} = 8$ ,  $n_{CKO} = 10$ .  $*P < 0.05$ . (g) Insulin  
46 tolerance test and AUC of Ctrl and CKO male mice in different treatment groups.  $n_{Ctrl}$   
47  $= 8$ ,  $n_{CKO} = 10$ . (e) Blood insulin levels at 0 min and 30 min after glucose injection and  
48 its fold changes of Ctrl and CKO male mice with different treatments.  $n_{Ctrl} = 8$ ,  $n_{CKO} =$   
49  $10$ .  $**P < 0.01$ . All the Ctrl and CKO male mice were performed the serum and  
50 metabolic tests at 8 weeks of age. Data (a-h) were shown as mean  $\pm$  s.e.m. and analyzed  
51 by unpaired two-tailed Student's *t*-tests. Statistical details are in Supplementary Table  
52 2. Source data are provided as a Source Data file.

53      **Supplementary Fig. 5**

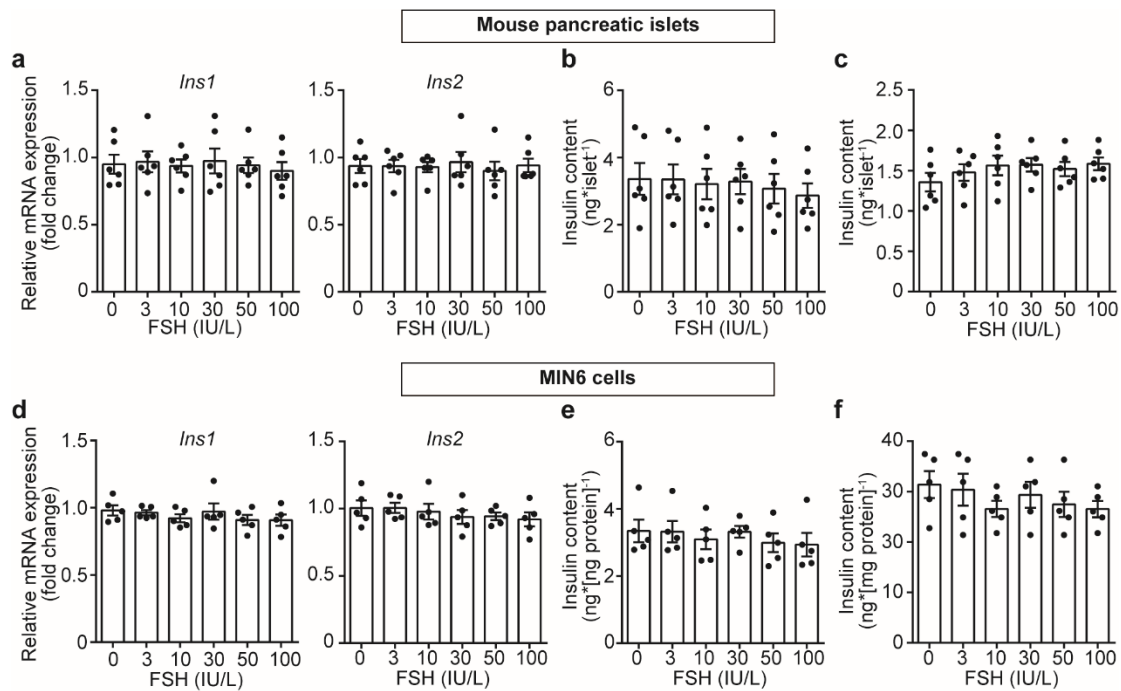

54

55      **Supplementary Figure 5. FSH, alone, did not stimulate insulin synthesis and**  
56      **secretion.**

57      **(a-b)** *Ins1*, *Ins2* mRNA expression **(a)** and intracellular insulin content **(b)** in mouse  
58      pancreatic islets treated with or without FSH for 48 hours. **(c)** Supernatant insulin  
59      secretion level in mouse pancreatic islets treated with or without FSH for 1 hour, under  
60      0 mM glucose. **(d-e)** *Ins1*, *Ins2* mRNA expression **(d)** and intracellular insulin content  
61      **(e)** in MIN6 cells treated with or without FSH for 48 hours. **(f)** Supernatant insulin  
62      secretion level in MIN6 cells treated with or without FSH for 1 hour, under 0 mM  
63      glucose. Data were shown as mean  $\pm$  s.e.m.,  $n = 6$  per group **(a-c)**,  $n = 5$  per group **(d-**  
64      **f)**. Statistical details are in Supplementary Table 2. Source data are provided as a Source  
65      Data file.

66      Supplementary Fig. 6

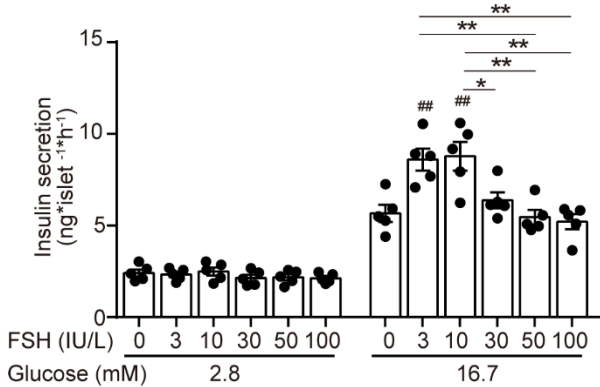

67

68      **Supplementary Figure 6. FSH regulated GSIS in a bell curve manner in pancreatic**  
69      **islets of male mice.**

70      GSIS in pancreatic islets from 10-week-old C57BL/6 male mice, with or without FSH,  
71      n = 5 for each group. \**P* < 0.05, \*\**P* < 0.01; #*P* < 0.05 compared to 0 IU/L FSH group.  
72      Data were presented as mean ± s.e.m. and analyzed by one-way ANOVA. Statistical  
73      details are in Supplementary Table 2. Source data are provided as a Source Data file.

74      **Supplementary Fig. 7**

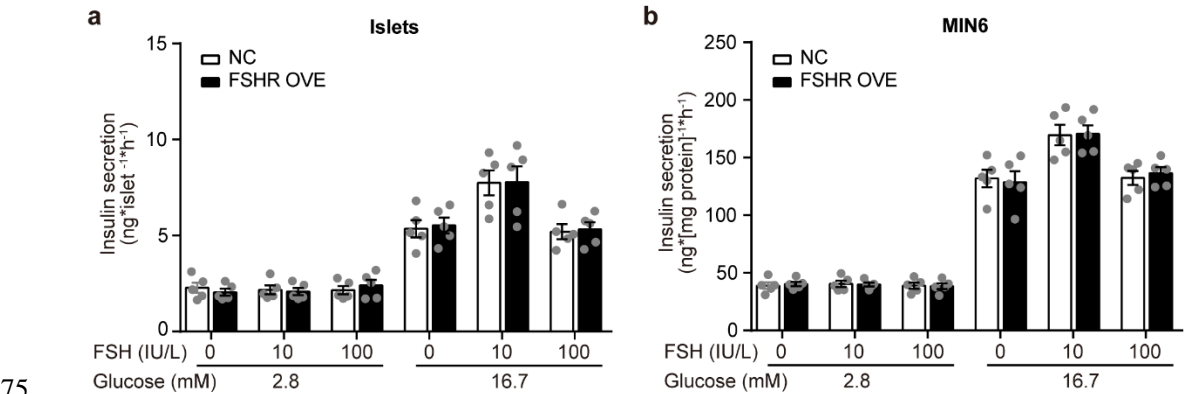

76      **Supplementary Figure 7. Overexpression of FSHR in WT pancreatic islets and**  
77      **MIN6 cells, there was not a significant improvement of GSIS.**

78      Pancreatic islets (a) and MIN6 cells (b) were transfected with either the scramble (NC)  
79      or the FSHR overexpression lentivirus (FSHR OVE), followed by GSIS assays with  
80      different concentrations of FSH. Data were shown as mean ± s.e.m., n = 5 per group.  
81      Statistical details are in Supplementary Table 2. Source data are provided as a Source  
82      Data file.



83      **Supplementary Fig. 8**

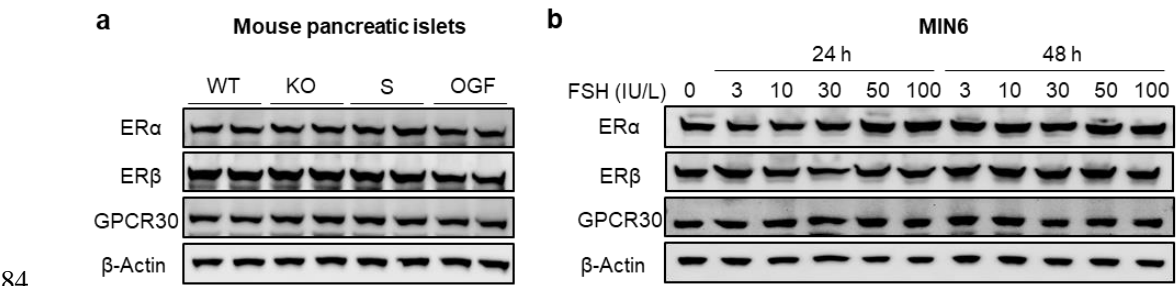

85      **Supplementary Figure 8. The expression of ERs was not altered on the pancreatic**  
86      **islets from FSHR KO mice and FSH-treated MIN6 cells.**

87      **(a)** The ERs expression on the pancreatic islets from WT and FSHR KO mice. **(b)** The  
88      ERs expression on the MIN6 cells with different concentrations of FSH treatment. The  
89      experiments were repeated 3 times with similar results.

90      **Supplementary Fig. 9**

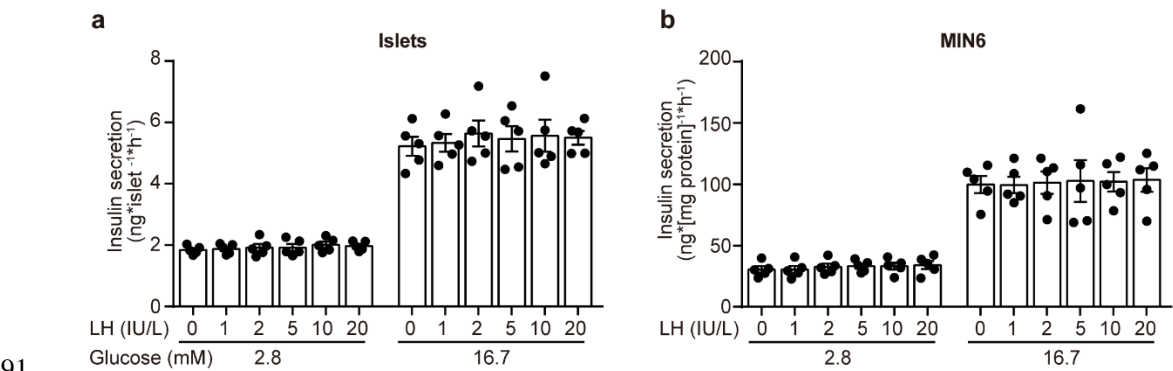

92      **Supplementary Figure 9. LH did not affect glucose stimulated insulin secretion.**

93      **(a)** GSIS in pancreatic islets from 10-week-old C57BL/6 female mice, with or without  
94      LH, n = 5 for each group. **(b)** GSIS in MIN6 cells, with or without LH, n = 5 for each  
95      group. Data were presented as mean  $\pm$  s.e.m. and analyzed by one-way ANOVA.  
96      Statistical details are in Supplementary Table 2. Source data are provided as a Source  
97      Data file.

98      **Supplementary Fig. 10**

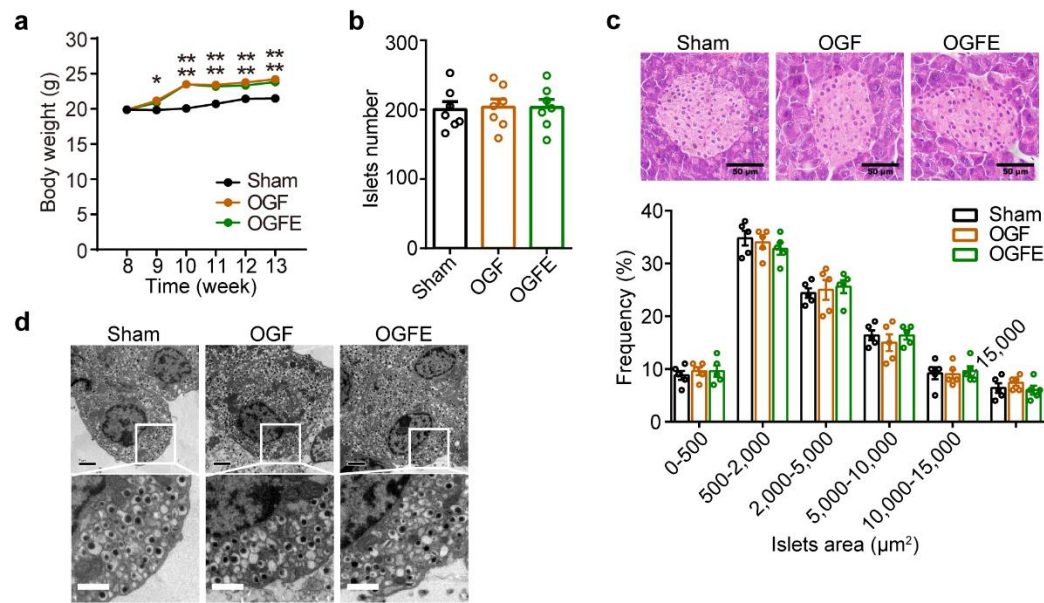

99

100      **Supplementary Figure 10. Pancreatic islet number, morphology, and**  
101      **ultrastructure in the OVX mouse model.**

102      (a) The body weight of mice in Sham, OGF and OGFE group. (b) The number of  
103      pancreatic islets of each group. Data are mean  $\pm$  s.e.m., n = 7 per group. (c) H&E  
104      staining in paraffin-embedded sections of the pancreas and the profiling of islet size  
105      distribution, scare bars, 50  $\mu$ m. Shown are representative images from 5 mice per group  
106      with similar results. (d) Electron microscopic images of pancreatic  $\beta$ -cells. scare bars,  
107      1  $\mu$ m. Statistical details are in Supplementary Table 2. Source data are provided as a  
108      Source Data file.

Supplementary Fig. 11

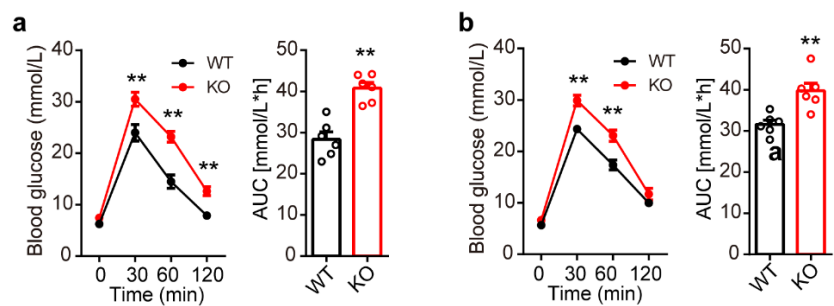

**Supplementary Figure 11. HFD aggravated glucose intolerance in FSHR KO mice.**

**(a)** Glucose tolerance test and AUC of WT and KO female mice fed with HFD.  $n_{WT} =$

6,  $n_{KO} = 6$ . **(b)** Glucose tolerance test and AUC of WT and KO male mice fed with HFD.

$n_{WT} = 6$ ,  $n_{KO} = 6$ .  $**P < 0.01$ , data were shown as mean  $\pm$  s.e.m. and analyzed by

unpaired two-tailed Student's *t*-tests. Statistical details are in Supplementary Table 2.

Source data are provided as a Source Data file.

Supplementary Figure 12

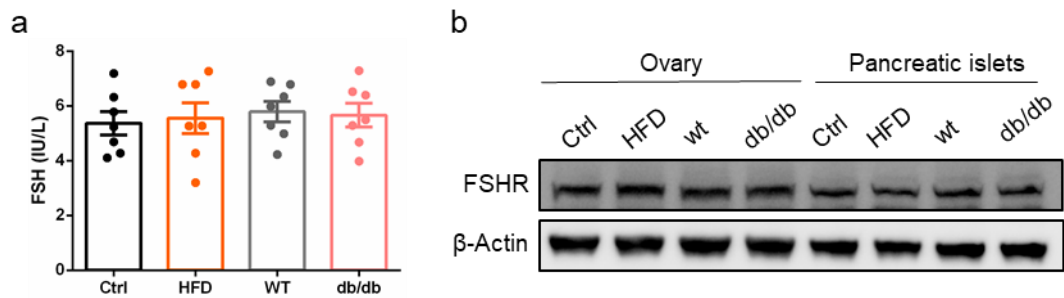

**Supplementary Figure 12. The serum FSH level and FSHR expression and was not altered in HFD mice and db/db mice.**

**(a)** Serum FSH levels in 20-week-old C57BL/6 female mice (Ctrl), HFD fed 20-week-old C57BL/6 female mice (HFD), 10-week-old WT and db/db female mice (db/db). Data were presented as mean  $\pm$  s.e.m.,  $n = 7$  per group. **(b)** FSHR expression in ovary and pancreatic islets from Ctrl, HFD, WT, and db/db mice. The experiments were performed 3 times independently with similar results. Statistical details are in Supplementary Table 2. Source data are provided as a Source Data file.

Supplementary Fig. 13

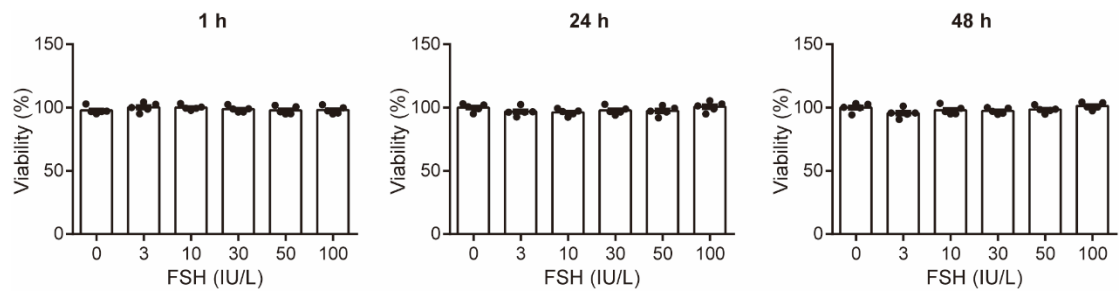

**Supplementary Figure 13. The effect of FSH on cell viability in MIN6 cells.**

Cell viability validation of MIN6 cells treated with different concentrations of FSH for 1 hour, 24 hours, or 48 hours. Data were shown as mean  $\pm$  s.e.m.,  $n = 5$  per group. Statistical details are in Supplementary Table 2. Source data are provided as a Source Data file.

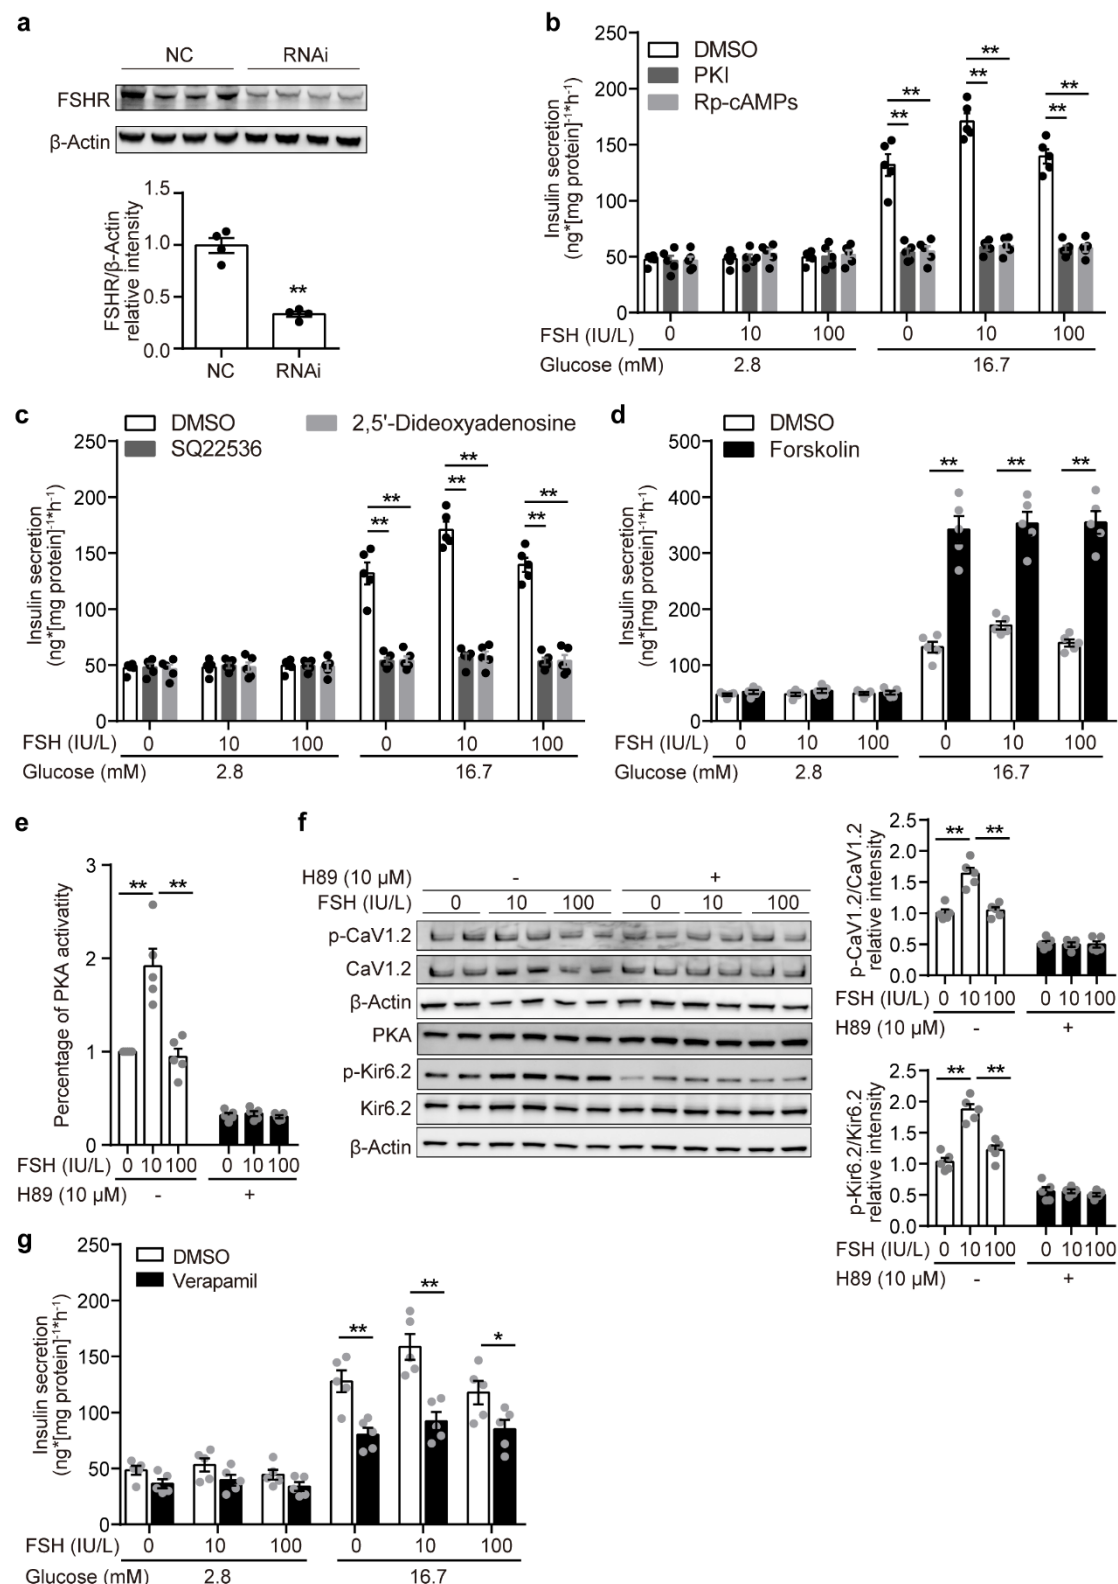

**Supplementary Figure 14. The effect of FSH on PKA pathway in MIN6 cells.**

(a) FSHR protein level in the MIN6 cells transfected with control siRNA (NC) or Fshr siRNA. (b) GSIS was tested in MIN6 cells treated with or without PKA inhibitor (PKI,

10  $\mu$ M; Rp-cAMPs, 10  $\mu$ M), n = 5 per group,  $^{**}P < 0.01$ . (c) GSIS was tested in MIN6 cells treated with or without AC inhibitor (SQ22536, 10  $\mu$ M; 2',5'-Dideoxyadenosine, 20  $\mu$ M), n = 5 per group,  $^{**}P < 0.01$ . (d) GSIS was tested in MIN6 cells treated with or without AC activator (Forskolin, 10  $\mu$ M), n = 5 per group,  $^{**}P < 0.01$ . (e) PKA activity was measured in MIN6 cells after stimulated with 16.7 mM glucose and different concentrations of FSH for 1 hour with or without PKA inhibitor (H89, 10  $\mu$ M), n = 5 per group,  $^{**}P < 0.01$ . (f) Representative protein levels of p-CaV1.2, and p-Kir6.2 were analyzed by immunoblotting in the MIN6 cells stimulated with 16.7 mM glucose and different concentrations of FSH for 1 hour with or without PKA inhibitor (H89, 10  $\mu$ M). (g) GSIS was tested in MIN6 cells treated with or without  $Ca^{2+}$  channel blocker (verapamil, 10  $\mu$ M), n = 5 per group,  $^{**}P < 0.01$ . All the data were shown as mean  $\pm$  s.e.m. and analyzed by one-way ANOVA (b, c, e, f) or unpaired two-tailed Student's *t*-tests (a, d, g). Statistical details are in Supplementary Table 2. Source data are provided as a Source Data file.



Supplementary Fig. 15

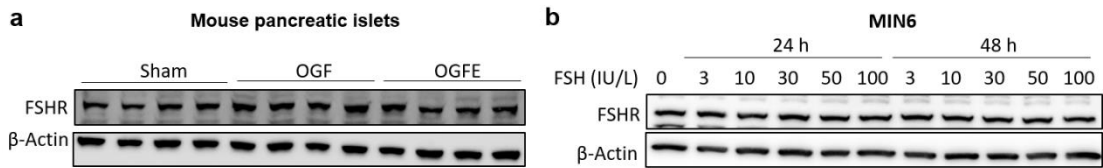

**Supplementary Figure 15. High FSH did not affect FSHR expression in the pancreatic islets of the OVX model and MIN6 cells.**

(a) Western blots were performed to examine FSHR expression in the pancreatic islets of the OVX model. (b) MIN6 cells treated with or without FSH for 24 hours or 48 hours, western blots were performed to examine FSHR expression in the MIN6 cells. The experiments were repeated 3 times with similar results.

Supplementary Fig. 16

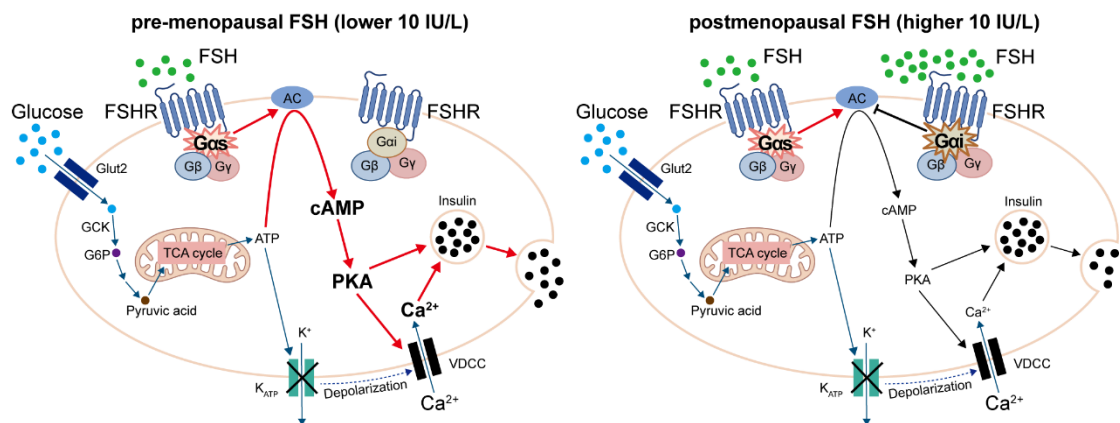

**Supplementary Figure 16. Schematic model depicting the proposed role of FSH/FSHR in pancreatic islet β-cells.**

Pre-menopausal FSH (lower than 10 IU/L) activates stimulatory G $\alpha$ s protein via FSHR, leading to adenylate cyclase (AC) activation, promoting the cAMP/PKA pathway and intracellular Ca<sup>2+</sup> accumulating to enhance GSIS (left). While the FSH level was higher than 10 IU/L, the postmenopausal FSH levels, FSH binding to FSHR could activate G $\alpha$ i as well, which inhibits the activation of AC and attenuate the cAMP/PKA pathway and intracellular Ca<sup>2+</sup> signaling, resulting in decreased GSIS (right).

**Supplementary Table 1. Primers used for RT-qPCR analysis.**

| Gene                    | Forward Primer           | Reverse Primer          |
|-------------------------|--------------------------|-------------------------|
| human<br>FSHR           | GTGCGGAACCCCAACATCGTG    | ATTCCTTGGATGGGTGTTGTG   |
| human<br>GAPDH          | GTGAACCATGAGAAGTATGACAAC | CATGAGTCCTTCCACGATACC   |
| mouse<br>Fshr           | GCTACACCCACATCTACCTCACAG | CTGGGCTTGCACCTCATAACAGC |
| mouse<br>Gapdh          | AGGTCGGTGTGAACGGATTTG    | TGTAGACCATGTAGTTGAGGTCA |
| mouse<br>Ins1           | CACTTCCTACCCCTGCTGG      | ACCACAAAGATGCTGTTTGACA  |
| mouse<br>Ins2           | CTTCTTCTACACACCCATGTCCC  | CCAAGGTCTGAAGGTCACCTG   |
| mouse<br>$\beta$ -Actin | AGTGTGACGTTGACATCCGT     | GCAGCTCAGTAACAGTCCGC    |

**Supplementary Table 2. Statistical tests.**

| Figures          | Statistical test                    | Comparisons           | p-value  |
|------------------|-------------------------------------|-----------------------|----------|
| 2a_FSH           | One-way ANOVA with<br>LSD post-test | WT vs. KO             | < 0.0001 |
|                  |                                     | WT vs. KO+E2          | < 0.0001 |
| 2a_E2            | One-way ANOVA with<br>LSD post-test | WT vs. KO             | < 0.0001 |
|                  |                                     | WT vs. KO+E2          | 0.7196   |
| 2c_GTT and AUC   | One-way ANOVA with<br>LSD post-test | 0 min: WT vs. KO      | 0.297    |
|                  |                                     | 0 min: WT vs. KO+E2   | 0.596    |
|                  |                                     | 30 min: WT vs. KO     | < 0.0001 |
|                  |                                     | 30 min: WT vs. KO+E2  | < 0.0001 |
|                  |                                     | 60 min: WT vs. KO     | < 0.0001 |
|                  |                                     | 60 min: WT vs. KO+E2  | 0.002    |
|                  |                                     | 120 min: WT vs. KO    | 0.003    |
|                  |                                     | 120 min: WT vs. KO+E2 | 0.009    |
|                  |                                     | AUC: WT vs. KO        | < 0.0001 |
|                  |                                     | AUC: WT vs. KO+E2     | < 0.0001 |
| 2d_ITT and AUC   | One-way ANOVA with<br>LSD post-test | 30 min: WT vs. KO     | 0.184    |
|                  |                                     | 30 min: WT vs. KO+E2  | 0.835    |
|                  |                                     | 60 min: WT vs. KO     | 0.109    |
|                  |                                     | 60 min: WT vs. KO+E2  | 0.283    |
|                  |                                     | 90 min: WT vs. KO     | 0.938    |
|                  |                                     | 90 min: WT vs. KO+E2  | 0.581    |
|                  |                                     | 120 min: WT vs. KO    | 0.615    |
|                  |                                     | 120 min: WT vs. KO+E2 | 0.338    |
|                  |                                     | AUC: WT vs. KO        | 0.932    |
|                  |                                     | AUC: WT vs. KO+E2     | 0.986    |
| 2e_blood insulin | One-way ANOVA with<br>LSD post-test | 0 min: WT vs. KO      | 0.567    |
|                  |                                     | 0 min: WT vs. KO+E2   | 0.333    |
|                  |                                     | 30 min: WT vs. KO     | < 0.0001 |
|                  |                                     | 30 min: WT vs. KO+E2  | < 0.0001 |
|                  |                                     | Fold: WT vs. KO       | < 0.0001 |
|                  |                                     | Fold: WT vs. KO+E2    | < 0.0001 |
| 2f_GTT and AUC   | Two-sided student's t-<br>test      | 0 min: Ctrl vs. CKO   | 0.317    |
|                  |                                     | 30 min: Ctrl vs. CKO  | 0.003    |
|                  |                                     | 60 min: Ctrl vs. CKO  | 0.02     |
|                  |                                     | 120 min: Ctrl vs. CKO | 0.007    |
|                  |                                     | AUC: Ctrl vs. CKO     | 0.004    |
| 2g_ITT and AUC   | Two-sided student's t-<br>test      | 30 min: Ctrl vs. CKO  | 0.971    |
|                  |                                     | 60 min: Ctrl vs. CKO  | 0.32     |
|                  |                                     | 90 min: Ctrl vs. CKO  | 0.844    |
|                  |                                     | 120 min: Ctrl vs. CKO | 0.622    |
|                  |                                     | AUC: Ctrl vs. CKO     | 0.599    |

|                            |                                                                 |                                    |          |
|----------------------------|-----------------------------------------------------------------|------------------------------------|----------|
| 2h_blood insulin           | Two-sided student's t-test                                      | 0 min: Ctrl vs. CKO                | 0.348    |
|                            |                                                                 | 30 min: Ctrl vs. CKO               | < 0.0001 |
|                            |                                                                 | Fold: Ctrl vs. CKO                 | < 0.0001 |
| 3a_GSIS_WT_16.7 mM glucose | One-way ANOVA with LSD post-test                                | 0 IU/L FSH vs. 3 IU/L FSH          | < 0.0001 |
|                            |                                                                 | 0 IU/L FSH vs. 10 IU/L FSH         | < 0.0001 |
|                            |                                                                 | 0 IU/L FSH vs. 30 IU/L FSH         | < 0.0001 |
|                            |                                                                 | 0 IU/L FSH vs. 50 IU/L FSH         | 0.004    |
|                            |                                                                 | 0 IU/L FSH vs. 100 IU/L FSH        | 0.053    |
|                            |                                                                 | 3 IU/L FSH vs. 10 IU/L FSH         | < 0.0001 |
|                            |                                                                 | 3 IU/L FSH vs. 30 IU/L FSH         | 0.157    |
|                            |                                                                 | 3 IU/L FSH vs. 50 IU/L FSH         | 0.019    |
|                            |                                                                 | 3 IU/L FSH vs. 100 IU/L FSH        | < 0.0001 |
|                            |                                                                 | 10 IU/L FSH vs. 30 IU/L FSH        | 0.001    |
|                            |                                                                 | 10 IU/L FSH vs. 50 IU/L FSH        | < 0.0001 |
|                            |                                                                 | 10 IU/L FSH vs. 100 IU/L FSH       | < 0.0001 |
|                            |                                                                 | 30 IU/L FSH vs. 50 IU/L FSH        | < 0.0001 |
|                            |                                                                 | 30 IU/L FSH vs. 100 IU/L FSH       | < 0.0001 |
|                            |                                                                 | 50 IU/L FSH vs. 100 IU/L FSH       | < 0.0001 |
| 3b_dynamic GSIS_WT         | One-way ANOVA with LSD post-test (at the indicated time points) | 15 min: 0 IU/L FSH vs. 10 IU/L FSH | 0.983    |
|                            |                                                                 | 17 min: 0 IU/L FSH vs. 10 IU/L FSH | 0.918    |
|                            |                                                                 | 19 min: 0 IU/L FSH vs. 10 IU/L FSH | 0.498    |
|                            |                                                                 | 21 min: 0 IU/L FSH vs. 10 IU/L FSH | 0.818    |
|                            |                                                                 | 23 min: 0 IU/L FSH vs. 10 IU/L FSH | 0.977    |
|                            |                                                                 | 25 min: 0 IU/L FSH vs. 10 IU/L FSH | 0.372    |
|                            |                                                                 | 27 min: 0 IU/L FSH vs. 10 IU/L FSH | 0.188    |
|                            |                                                                 | 29 min: 0 IU/L FSH vs. 10 IU/L FSH | 0.265    |
|                            |                                                                 | 31 min: 0 IU/L FSH vs. 10 IU/L FSH | 0.032    |
|                            |                                                                 | 33 min: 0 IU/L FSH vs. 10 IU/L FSH | 0.001    |
|                            |                                                                 | 35 min: 0 IU/L FSH vs. 10 IU/L FSH | < 0.0001 |
|                            |                                                                 | 37 min: 0 IU/L FSH vs. 10 IU/L FSH | 0.061    |
|                            |                                                                 | 38 min: 0 IU/L FSH vs. 10 IU/L FSH | 0.009    |
|                            |                                                                 | 40 min: 0 IU/L FSH vs. 10 IU/L FSH | 0.008    |
|                            |                                                                 | 42 min: 0 IU/L FSH vs. 10 IU/L FSH | 0.005    |
|                            |                                                                 | 44 min: 0 IU/L FSH vs. 10 IU/L FSH | 0.001    |
|                            |                                                                 | 46 min: 0 IU/L FSH vs. 10 IU/L FSH | 0.048    |
|                            |                                                                 | 48 min: 0 IU/L FSH vs. 10 IU/L FSH | 0.044    |
|                            |                                                                 | 50 min: 0 IU/L FSH vs. 10 IU/L FSH | 0.001    |
|                            |                                                                 | 52 min: 0 IU/L FSH vs. 10 IU/L FSH | < 0.0001 |
|                            |                                                                 | 54 min: 0 IU/L FSH vs. 10 IU/L FSH | 0.008    |
|                            |                                                                 | 56 min: 0 IU/L FSH vs. 10 IU/L FSH | 0.087    |
|                            |                                                                 | 58 min: 0 IU/L FSH vs. 10 IU/L FSH | 0.298    |
|                            |                                                                 | 60 min: 0 IU/L FSH vs. 10 IU/L FSH | 0.311    |
|                            |                                                                 | 62 min: 0 IU/L FSH vs. 10 IU/L FSH | 0.959    |

|  |                                      |          |
|--|--------------------------------------|----------|
|  | 64 min: 0 IU/L FSH vs. 10 IU/L FSH   | 0.891    |
|  | 66 min: 0 IU/L FSH vs. 10 IU/L FSH   | 0.878    |
|  | 68 min: 0 IU/L FSH vs. 10 IU/L FSH   | 0.245    |
|  | 70 min: 0 IU/L FSH vs. 10 IU/L FSH   | 0.964    |
|  | 72 min: 0 IU/L FSH vs. 10 IU/L FSH   | 0.682    |
|  | 74 min: 0 IU/L FSH vs. 10 IU/L FSH   | 0.283    |
|  | 15 min: 10 IU/L FSH vs. 100 IU/L FSH | 0.561    |
|  | 17 min: 10 IU/L FSH vs. 100 IU/L FSH | 0.12     |
|  | 19 min: 10 IU/L FSH vs. 100 IU/L FSH | 0.029    |
|  | 21 min: 10 IU/L FSH vs. 100 IU/L FSH | 0.015    |
|  | 23 min: 10 IU/L FSH vs. 100 IU/L FSH | 0.048    |
|  | 25 min: 10 IU/L FSH vs. 100 IU/L FSH | 0.005    |
|  | 27 min: 10 IU/L FSH vs. 100 IU/L FSH | 0.184    |
|  | 29 min: 10 IU/L FSH vs. 100 IU/L FSH | 0.001    |
|  | 31 min: 10 IU/L FSH vs. 100 IU/L FSH | 0.007    |
|  | 33 min: 10 IU/L FSH vs. 100 IU/L FSH | < 0.0001 |
|  | 35 min: 10 IU/L FSH vs. 100 IU/L FSH | < 0.0001 |
|  | 37 min: 10 IU/L FSH vs. 100 IU/L FSH | < 0.0001 |
|  | 38 min: 10 IU/L FSH vs. 100 IU/L FSH | < 0.0001 |
|  | 40 min: 10 IU/L FSH vs. 100 IU/L FSH | < 0.0001 |
|  | 42 min: 10 IU/L FSH vs. 100 IU/L FSH | 0.001    |
|  | 44 min: 10 IU/L FSH vs. 100 IU/L FSH | < 0.0001 |
|  | 46 min: 10 IU/L FSH vs. 100 IU/L FSH | 0.005    |
|  | 48 min: 10 IU/L FSH vs. 100 IU/L FSH | 0.011    |

|                |                                  |                                      |          |
|----------------|----------------------------------|--------------------------------------|----------|
|                |                                  | 50 min: 10 IU/L FSH vs. 100 IU/L FSH | < 0.0001 |
|                |                                  | 52 min: 10 IU/L FSH vs. 100 IU/L FSH | < 0.0001 |
|                |                                  | 54 min: 10 IU/L FSH vs. 100 IU/L FSH | 0.004    |
|                |                                  | 56 min: 10 IU/L FSH vs. 100 IU/L FSH | 0.006    |
|                |                                  | 58 min: 10 IU/L FSH vs. 100 IU/L FSH | 0.164    |
|                |                                  | 60 min: 10 IU/L FSH vs. 100 IU/L FSH | 0.465    |
|                |                                  | 62 min: 10 IU/L FSH vs. 100 IU/L FSH | 0.191    |
|                |                                  | 64 min: 10 IU/L FSH vs. 100 IU/L FSH | 0.134    |
|                |                                  | 66 min: 10 IU/L FSH vs. 100 IU/L FSH | 0.055    |
|                |                                  | 68 min: 10 IU/L FSH vs. 100 IU/L FSH | 0.011    |
|                |                                  | 70 min: 10 IU/L FSH vs. 100 IU/L FSH | 0.033    |
|                |                                  | 72 min: 10 IU/L FSH vs. 100 IU/L FSH | 0.011    |
|                |                                  | 74 min: 10 IU/L FSH vs. 100 IU/L FSH | 0.077    |
| 4b_FSH         | One-way ANOVA with LSD post-test | Sham vs. OGF                         | < 0.0001 |
|                |                                  | Sham vs. OGFE                        | < 0.0001 |
|                |                                  | OGF vs. OGFE                         | 0.4      |
| 4b_E2          | One-way ANOVA with LSD post-test | Sham vs. OGF                         | < 0.0001 |
|                |                                  | Sham vs. OGFE                        | 0.798    |
|                |                                  | OGF vs. OGFE                         | < 0.0001 |
| 4c_GTT and AUC | One-way ANOVA with LSD post-test | 0 min: Sham vs. OGF                  | 0.81     |
|                |                                  | 0 min: Sham vs. OGFE                 | 0.62     |
|                |                                  | 0 min: OGF vs. OGFE                  | 0.461    |
|                |                                  | 30 min: Sham vs. OGF                 | < 0.0001 |
|                |                                  | 30 min: Sham vs. OGFE                | 0.007    |
|                |                                  | 30 min: OGF vs. OGFE                 | 0.003    |
|                |                                  | 60 min: Sham vs. OGF                 | < 0.0001 |
|                |                                  | 60 min: Sham vs. OGFE                | 0.002    |
|                |                                  | 60 min: OGF vs. OGFE                 | 0.089    |
|                |                                  | 120 min: Sham vs. OGF                | 0.009    |
|                |                                  | 120 min: Sham vs. OGFE               | 0.167    |

|                               |                                     |                              |          |
|-------------------------------|-------------------------------------|------------------------------|----------|
|                               |                                     | 120 min: OGF vs. OGFE        | 0.21     |
|                               |                                     | AUC: Sham vs. OGF            | < 0.0001 |
|                               |                                     | AUC: Sham vs. OGFE           | 0.005    |
|                               |                                     | AUC: OGF vs. OGFE            | 0.027    |
| 4d_ITT and AUC                | One-way ANOVA with<br>LSD post-test | 30 min: Sham vs. OGF         | 0.133    |
|                               |                                     | 30 min: Sham vs. OGFE        | 0.944    |
|                               |                                     | 30 min: OGF vs. OGFE         | 0.167    |
|                               |                                     | 60 min: Sham vs. OGF         | 0.06     |
|                               |                                     | 60 min: Sham vs. OGFE        | 0.32     |
|                               |                                     | 60 min: OGF vs. OGFE         | 0.497    |
|                               |                                     | 90 min: Sham vs. OGF         | 0.886    |
|                               |                                     | 90 min: Sham vs. OGFE        | 0.624    |
|                               |                                     | 90 min: OGF vs. OGFE         | 0.532    |
|                               |                                     | 120 min: Sham vs. OGF        | 0.831    |
|                               |                                     | 120 min: Sham vs. OGFE       | 0.368    |
|                               |                                     | 120 min: OGF vs. OGFE        | 0.483    |
|                               |                                     | AUC: Sham vs. OGF            | 0.151    |
|                               |                                     | AUC: Sham vs. OGFE           | 0.84     |
|                               |                                     | AUC: OGF vs. OGFE            | 0.232    |
| 4e_blood insulin              | One-way ANOVA with<br>LSD post-test | 0 min: Sham vs. OGF          | 0.759    |
|                               |                                     | 0 min: Sham vs. OGFE         | 0.869    |
|                               |                                     | 0 min: OGF vs. OGFE          | 0.878    |
|                               |                                     | 30 min: Sham vs. OGF         | < 0.0001 |
|                               |                                     | 30 min: Sham vs. OGFE        | < 0.0001 |
|                               |                                     | 30 min: OGF vs. OGFE         | 0.058    |
|                               |                                     | Fold: Sham vs. OGF           | < 0.0001 |
|                               |                                     | Fold: Sham vs. OGFE          | < 0.0001 |
|                               |                                     | Fold: OGF vs. OGFE           | 0.008    |
| 5a_GSIS_NC_16.7 mM<br>glucose | One-way ANOVA with<br>LSD post-test | 0 IU/L FSH vs. 3 IU/L FSH    | < 0.0001 |
|                               |                                     | 0 IU/L FSH vs. 10 IU/L FSH   | < 0.0001 |
|                               |                                     | 0 IU/L FSH vs. 30 IU/L FSH   | 0.003    |
|                               |                                     | 0 IU/L FSH vs. 50 IU/L FSH   | 0.125    |
|                               |                                     | 0 IU/L FSH vs. 100 IU/L FSH  | 0.405    |
|                               |                                     | 3 IU/L FSH vs. 10 IU/L FSH   | 0.005    |
|                               |                                     | 3 IU/L FSH vs. 30 IU/L FSH   | 0.392    |
|                               |                                     | 3 IU/L FSH vs. 50 IU/L FSH   | 0.017    |
|                               |                                     | 3 IU/L FSH vs. 100 IU/L FSH  | < 0.0001 |
|                               |                                     | 10 IU/L FSH vs. 30 IU/L FSH  | < 0.0001 |
|                               |                                     | 10 IU/L FSH vs. 50 IU/L FSH  | < 0.0001 |
|                               |                                     | 10 IU/L FSH vs. 100 IU/L FSH | < 0.0001 |
|                               |                                     | 30 IU/L FSH vs. 50 IU/L FSH  | 0.115    |
|                               |                                     | 30 IU/L FSH vs. 100 IU/L FSH | < 0.0001 |
|                               |                                     | 50 IU/L FSH vs. 100 IU/L FSH | 0.02     |



|                            |                                                                       |                                    |          |
|----------------------------|-----------------------------------------------------------------------|------------------------------------|----------|
| 5b_cAMP                    | One-way ANOVA with<br>LSD post-test                                   | 0 IU/L FSH vs. 3 IU/L FSH          | < 0.0001 |
|                            |                                                                       | 0 IU/L FSH vs. 10 IU/L FSH         | < 0.0001 |
|                            |                                                                       | 0 IU/L FSH vs. 30 IU/L FSH         | < 0.0001 |
|                            |                                                                       | 0 IU/L FSH vs. 50 IU/L FSH         | < 0.0001 |
|                            |                                                                       | 0 IU/L FSH vs. 100 IU/L FSH        | 0.63     |
|                            |                                                                       | 3 IU/L FSH vs. 10 IU/L FSH         | < 0.0001 |
|                            |                                                                       | 3 IU/L FSH vs. 30 IU/L FSH         | 0.397    |
|                            |                                                                       | 3 IU/L FSH vs. 50 IU/L FSH         | 0.667    |
|                            |                                                                       | 3 IU/L FSH vs. 100 IU/L FSH        | < 0.0001 |
|                            |                                                                       | 10 IU/L FSH vs. 30 IU/L FSH        | 0.004    |
|                            |                                                                       | 10 IU/L FSH vs. 50 IU/L FSH        | < 0.0001 |
|                            |                                                                       | 10 IU/L FSH vs. 100 IU/L FSH       | < 0.0001 |
|                            |                                                                       | 30 IU/L FSH vs. 50 IU/L FSH        | 0.204    |
|                            |                                                                       | 30 IU/L FSH vs. 100 IU/L FSH       | < 0.0001 |
|                            |                                                                       | 50 IU/L FSH vs. 100 IU/L FSH       | < 0.0001 |
| 5c_PKA                     | One-way ANOVA with<br>LSD post-test                                   | 0 IU/L FSH vs. 3 IU/L FSH          | < 0.0001 |
|                            |                                                                       | 0 IU/L FSH vs. 10 IU/L FSH         | < 0.0001 |
|                            |                                                                       | 0 IU/L FSH vs. 30 IU/L FSH         | < 0.0001 |
|                            |                                                                       | 0 IU/L FSH vs. 50 IU/L FSH         | < 0.0001 |
|                            |                                                                       | 0 IU/L FSH vs. 100 IU/L FSH        | 0.578    |
|                            |                                                                       | 3 IU/L FSH vs. 10 IU/L FSH         | < 0.0001 |
|                            |                                                                       | 3 IU/L FSH vs. 30 IU/L FSH         | 0.014    |
|                            |                                                                       | 3 IU/L FSH vs. 50 IU/L FSH         | 0.649    |
|                            |                                                                       | 3 IU/L FSH vs. 100 IU/L FSH        | < 0.0001 |
|                            |                                                                       | 10 IU/L FSH vs. 30 IU/L FSH        | 0.001    |
|                            |                                                                       | 10 IU/L FSH vs. 50 IU/L FSH        | < 0.0001 |
|                            |                                                                       | 10 IU/L FSH vs. 100 IU/L FSH       | < 0.0001 |
|                            |                                                                       | 30 IU/L FSH vs. 50 IU/L FSH        | 0.004    |
|                            |                                                                       | 30 IU/L FSH vs. 100 IU/L FSH       | < 0.0001 |
|                            |                                                                       | 50 IU/L FSH vs. 100 IU/L FSH       | < 0.0001 |
| 5d_GSIS_16.7 mM<br>glucose | One-way ANOVA with<br>LSD post-test                                   | 0 IU/L FSH: DMSO vs. H89           | < 0.0001 |
|                            |                                                                       | 10 IU/L FSH: DMSO vs. H89          | < 0.0001 |
|                            |                                                                       | 100 IU/L FSH: DMSO vs. H89         | < 0.0001 |
|                            |                                                                       | DMSO: 0 IU/L FSH vs. 10 IU/L FSH   | < 0.0001 |
|                            |                                                                       | DMSO: 10 IU/L FSH vs. 100 IU/L FSH | 0.002    |
| 5e_Ca <sup>2+</sup> levels | One-way ANOVA with<br>LSD post-test (at the<br>indicated time points) | 0 min: 0 IU/L FSH vs. 10 IU/L FSH  | 0.535    |
|                            |                                                                       | 5 min: 0 IU/L FSH vs. 10 IU/L FSH  | 0.316    |
|                            |                                                                       | 10 min: 0 IU/L FSH vs. 10 IU/L FSH | 0.164    |
|                            |                                                                       | 15 min: 0 IU/L FSH vs. 10 IU/L FSH | 0.005    |
|                            |                                                                       | 20 min: 0 IU/L FSH vs. 10 IU/L FSH | 0.001    |
|                            |                                                                       | 25 min: 0 IU/L FSH vs. 10 IU/L FSH | 0.003    |
|                            |                                                                       | 30 min: 0 IU/L FSH vs. 10 IU/L FSH | 0.007    |

|                                  |                            |                                      |          |
|----------------------------------|----------------------------|--------------------------------------|----------|
|                                  |                            | 35 min: 0 IU/L FSH vs. 10 IU/L FSH   | 0.004    |
|                                  |                            | 40 min: 0 IU/L FSH vs. 10 IU/L FSH   | 0.017    |
|                                  |                            | 45 min: 0 IU/L FSH vs. 10 IU/L FSH   | 0.011    |
|                                  |                            | 50 min: 0 IU/L FSH vs. 10 IU/L FSH   | 0.006    |
|                                  |                            | 55 min: 0 IU/L FSH vs. 10 IU/L FSH   | 0.009    |
|                                  |                            | 60 min: 0 IU/L FSH vs. 10 IU/L FSH   | 0.071    |
|                                  |                            | 0 min: 10 IU/L FSH vs. 100 IU/L FSH  | 0.539    |
|                                  |                            | 5 min: 10 IU/L FSH vs. 100 IU/L FSH  | 0.465    |
|                                  |                            | 10 min: 10 IU/L FSH vs. 100 IU/L FSH | 0.07     |
|                                  |                            | 15 min: 10 IU/L FSH vs. 100 IU/L FSH | 0.011    |
|                                  |                            | 20 min: 10 IU/L FSH vs. 100 IU/L FSH | 0.002    |
|                                  |                            | 25 min: 10 IU/L FSH vs. 100 IU/L FSH | 0.005    |
|                                  |                            | 30 min: 10 IU/L FSH vs. 100 IU/L FSH | 0.008    |
|                                  |                            | 35 min: 10 IU/L FSH vs. 100 IU/L FSH | 0.008    |
|                                  |                            | 40 min: 10 IU/L FSH vs. 100 IU/L FSH | 0.006    |
|                                  |                            | 45 min: 10 IU/L FSH vs. 100 IU/L FSH | 0.009    |
|                                  |                            | 50 min: 10 IU/L FSH vs. 100 IU/L FSH | 0.002    |
|                                  |                            | 55 min: 10 IU/L FSH vs. 100 IU/L FSH | 0.009    |
|                                  |                            | 60 min: 10 IU/L FSH vs. 100 IU/L FSH | 0.114    |
| 5g_GSIS and cAMP                 | Two-sided student's t-test | 2.8 mM glucose: DMSO vs. NF449       | 0.063    |
|                                  |                            | 16.7 mM glucose: DMSO vs. NF449      | 0.039    |
|                                  |                            | cAMP: DMSO vs. NF449                 | 0.002    |
| 5h_GSIS_16.7 mM glucose and cAMP | Two-sided student's t-test | 2.8 mM glucose: DMSO vs. NF449       | 0.499    |
|                                  |                            | 16.7 mM glucose: DMSO vs. NF449      | 0.049    |
|                                  |                            | cAMP: DMSO vs. NF449                 | 0.031    |
| 5k_GSIS_16.7 mM glucose and cAMP | Two-sided student's t-test | 2.8 mM glucose: DMSO vs. PTX         | 0.476    |
|                                  |                            | 16.7 mM glucose: DMSO vs. PTX        | 0.006    |
|                                  |                            | cAMP: DMSO vs. PTX                   | 0.01     |
| Supplementary Fig. 3b_GSIS       | Two-sided student's t-test | 16.7 mM: WT vs. KO                   | 0.010202 |

|                                                    |                                     |                              |          |
|----------------------------------------------------|-------------------------------------|------------------------------|----------|
| Supplementary<br>Fig. 4b_GTT and AUC               | Two-sided student's t-test          | 0 min: WT vs. KO             | 0.008    |
|                                                    |                                     | 30 min: WT vs. KO            | 0.019    |
|                                                    |                                     | 60 min: WT vs. KO            | 0.151    |
|                                                    |                                     | 120 min: WT vs. KO           | 0.603    |
|                                                    |                                     | AUC: WT vs. KO               | 0.025    |
| Supplementary<br>Fig. 4d_blood insulin             | Two-sided student's t-test          | 0 min: WT vs. KO             | 0.907    |
|                                                    |                                     | 30 min: WT vs. KO            | < 0.0001 |
|                                                    |                                     | Fold: WT vs. KO              | < 0.0001 |
| Supplementary<br>Fig. 4f_GTT and AUC               | Two-sided student's t-test          | 0 min: Ctrl vs. CKO          | 0.148    |
|                                                    |                                     | 30 min: Ctrl vs. CKO         | 0.012    |
|                                                    |                                     | 60 min: Ctrl vs. CKO         | 0.031    |
|                                                    |                                     | 120 min: Ctrl vs. CKO        | 0.172    |
|                                                    |                                     | AUC: Ctrl vs. CKO            | 0.029    |
| Supplementary<br>Fig. 4h_blood insulin             | Two-sided student's t-test          | 0 min: Ctrl vs. CKO          | 0.416    |
|                                                    |                                     | 30 min: Ctrl vs. CKO         | < 0.0001 |
|                                                    |                                     | Fold: Ctrl vs. CKO           | < 0.0001 |
| Supplementary Fig. 5                               | One-way ANOVA with<br>LSD post-test | for all                      | >0.05    |
| Supplementary<br>Fig. 6_GSIS_WT_16.7<br>mM glucose | One-way ANOVA with<br>LSD post-test | 0 IU/L FSH vs. 3 IU/L FSH    | 0.001    |
|                                                    |                                     | 0 IU/L FSH vs. 10 IU/L FSH   | < 0.0001 |
|                                                    |                                     | 0 IU/L FSH vs. 30 IU/L FSH   | 0.354    |
|                                                    |                                     | 0 IU/L FSH vs. 50 IU/L FSH   | 0.788    |
|                                                    |                                     | 0 IU/L FSH vs. 100 IU/L FSH  | 0.544    |
|                                                    |                                     | 3 IU/L FSH vs. 10 IU/L FSH   | 0.812    |
|                                                    |                                     | 3 IU/L FSH vs. 30 IU/L FSH   | 0.007    |
|                                                    |                                     | 3 IU/L FSH vs. 50 IU/L FSH   | < 0.0001 |
|                                                    |                                     | 3 IU/L FSH vs. 100 IU/L FSH  | < 0.0001 |
|                                                    |                                     | 10 IU/L FSH vs. 30 IU/L FSH  | 0.004    |
|                                                    |                                     | 10 IU/L FSH vs. 50 IU/L FSH  | < 0.0001 |
|                                                    |                                     | 10 IU/L FSH vs. 100 IU/L FSH | < 0.0001 |
|                                                    |                                     | 30 IU/L FSH vs. 50 IU/L FSH  | 0.235    |
|                                                    |                                     | 30 IU/L FSH vs. 100 IU/L FSH | 0.132    |
|                                                    |                                     | 50 IU/L FSH vs. 100 IU/L FSH | 0.735    |
| Supplementary<br>Fig. 7a_GSIS_16.7 mM<br>glucose   | One-way ANOVA with<br>LSD post-test | 0 IU/FSH: NC vs. FSHR OVE    | 0.826    |
|                                                    |                                     | 10 IU/FSH: NC vs. FSHR OVE   | 0.961    |
|                                                    |                                     | 100 IU/FSH: NC vs. FSHR OVE  | 0.873    |
| Supplementary<br>Fig. 7b_GSIS_16.7 mM<br>glucose   | One-way ANOVA with<br>LSD post-test | 0 IU/FSH: NC vs. FSHR OVE    | 0.767    |
|                                                    |                                     | 10 IU/FSH: NC vs. FSHR OVE   | 0.92     |
|                                                    |                                     | 100 IU/FSH: NC vs. FSHR OVE  | 0.709    |
| Supplementary Fig. 9a                              | One-way ANOVA with<br>LSD post-test | for all                      | >0.05    |
| Supplementary Fig. 9b                              | One-way ANOVA with<br>LSD post-test | for all                      | >0.05    |

|                                                   |                                     |                                                 |          |
|---------------------------------------------------|-------------------------------------|-------------------------------------------------|----------|
| Supplementary<br>Fig. 10a_body weight             | One-way ANOVA with<br>LSD post-test | 8w: Sham vs. OGF                                | 0.977    |
|                                                   |                                     | 8w: Sham vs. OGFE                               | 0.964    |
|                                                   |                                     | 8w: OGF vs. OGFE                                | 0.945    |
|                                                   |                                     | 9w: Sham vs. OGF                                | 0.017    |
|                                                   |                                     | 9w: Sham vs. OGFE                               | 0.053    |
|                                                   |                                     | 9w: OGF vs. OGFE                                | 0.618    |
|                                                   |                                     | 10w: Sham vs. OGF                               | < 0.0001 |
|                                                   |                                     | 10w: Sham vs. OGFE                              | < 0.0001 |
|                                                   |                                     | 10w: OGF vs. OGFE                               | 0.972    |
|                                                   |                                     | 11w: Sham vs. OGF                               | < 0.0001 |
|                                                   |                                     | 11w: Sham vs. OGFE                              | < 0.0001 |
|                                                   |                                     | 11w: OGF vs. OGFE                               | 0.546    |
|                                                   |                                     | 12w: Sham vs. OGF                               | < 0.0001 |
|                                                   |                                     | 12w: Sham vs. OGFE                              | < 0.0001 |
|                                                   |                                     | 12w: OGF vs. OGFE                               | 0.202    |
|                                                   |                                     | 13w: Sham vs. OGF                               | < 0.0001 |
|                                                   |                                     | 13w: Sham vs. OGFE                              | < 0.0001 |
|                                                   |                                     | 13w: OGF vs. OGFE                               | 0.377    |
| Supplementary<br>Fig. 11a_GTT and AUC             | Two-sided student's t-<br>test      | 0 min: WT vs. KO                                | 0.164    |
|                                                   |                                     | 30 min: WT vs. KO                               | 0.011    |
|                                                   |                                     | 60 min: WT vs. KO                               | < 0.0001 |
|                                                   |                                     | 120 min: WT vs. KO                              | 0.001    |
|                                                   |                                     | AUC: WT vs. KO                                  | < 0.0001 |
| Supplementary<br>Fig. 11b_GTT and AUC             | Two-sided student's t-<br>test      | 0 min: WT vs. KO                                | 0.075    |
|                                                   |                                     | 30 min: WT vs. KO                               | 0.001    |
|                                                   |                                     | 60 min: WT vs. KO                               | 0.003    |
|                                                   |                                     | 120 min: WT vs. KO                              | 0.208    |
|                                                   |                                     | AUC: WT vs. KO                                  | 0.003    |
| Supplementary<br>Fig. 12a_GTT and AUC             | Two-sided student's t-<br>test      | Ctrl vs. HFD                                    | 0.801    |
|                                                   |                                     | WT vs. db/db                                    | 0.836    |
| Supplementary Fig. 13                             | One-way ANOVA with<br>LSD post-test | for all                                         | >0.05    |
| Supplementary Fig. 14a                            | Two-sided student's t-<br>test      | NC vs. RNAi                                     | < 0.0001 |
| Supplementary<br>Fig. 14b_GSIS_16.7 mM<br>glucose | One-way ANOVA with<br>LSD post-test | 0 IU/L FSH: DMSO vs. PKI                        | < 0.0001 |
|                                                   |                                     | 0 IU/L FSH: DMSO vs. Rp-cAMPs                   | < 0.0001 |
|                                                   |                                     | 10 IU/L FSH: DMSO vs. PKI                       | < 0.0001 |
|                                                   |                                     | 10 IU/L FSH: DMSO vs. Rp-cAMPs                  | < 0.0001 |
|                                                   |                                     | 100 IU/L FSH: DMSO vs. PKI                      | < 0.0001 |
|                                                   |                                     | 100 IU/L FSH: DMSO vs. Rp-cAMPs                 | < 0.0001 |
| Supplementary<br>Fig. 14c_GSIS_16.7 mM<br>glucose | One-way ANOVA with<br>LSD post-test | 0 IU/L FSH: DMSO vs. SQ22536                    | < 0.0001 |
|                                                   |                                     | 0 IU/L FSH: DMSO vs. 2',5'-<br>Dideoxyadenosine | < 0.0001 |

|                                             |                                  |                                               |          |
|---------------------------------------------|----------------------------------|-----------------------------------------------|----------|
|                                             |                                  | 10 IU/L FSH: DMSO vs. SQ22536                 | < 0.0001 |
|                                             |                                  | 10 IU/L FSH: DMSO vs. 2',5'-Dideoxyadenosine  | < 0.0001 |
|                                             |                                  | 100 IU/L FSH: DMSO vs. SQ22536                | < 0.0001 |
|                                             |                                  | 100 IU/L FSH: DMSO vs. 2',5'-Dideoxyadenosine | < 0.0001 |
| Supplementary Fig. 14d_GSIS_16.7 mM glucose | One-way ANOVA with LSD post-test | 0 IU/L FSH: DMSO vs. Forskolin                | < 0.0001 |
|                                             |                                  | 10 IU/L FSH: DMSO vs. Forskolin               | < 0.0001 |
|                                             |                                  | 100 IU/L FSH: DMSO vs. Forskolin              | < 0.0001 |
| Supplementary Fig. 14e                      | One-way ANOVA with LSD post-test | H89-: 0 IU/L FSH vs.10 IU/L FSH               | < 0.0001 |
|                                             |                                  | H89-: 10 IU/L FSH vs.100 IU/L FSH             | < 0.0001 |
|                                             |                                  | H89+: 0 IU/L FSH vs.10 IU/L FSH               | 0.88     |
|                                             |                                  | H89+: 10 IU/L FSH vs.100 IU/L FSH             | 0.787    |
| Supplementary Fig. 14f_pCaV1.2/CaV1.2       | One-way ANOVA with LSD post-test | H89-: 0 IU/L FSH vs.10 IU/L FSH               | < 0.0001 |
|                                             |                                  | H89-: 10 IU/L FSH vs.100 IU/L FSH             | < 0.0001 |
|                                             |                                  | H89+: 0 IU/L FSH vs.10 IU/L FSH               | 0.807    |
|                                             |                                  | H89+: 10 IU/L FSH vs.100 IU/L FSH             | 0.98     |
| Supplementary Fig. 14f_pKir6.2/Kir6.2       | One-way ANOVA with LSD post-test | H89-: 0 IU/L FSH vs.10 IU/L FSH               | < 0.0001 |
|                                             |                                  | H89-: 10 IU/L FSH vs.100 IU/L FSH             | < 0.0001 |
|                                             |                                  | H89+: 0 IU/L FSH vs.10 IU/L FSH               | 0.991    |
|                                             |                                  | H89+: 10 IU/L FSH vs.100 IU/L FSH             | 0.547    |
| Supplementary Fig. 14g_GSIS_16.7 mM glucose | One-way ANOVA with LSD post-test | 0 IU/L FSH: DMSO vs. Verapamil                | 0.001    |
|                                             |                                  | 10 IU/L FSH: DMSO vs. Verapamil               | < 0.0001 |
|                                             |                                  | 100 IU/L FSH: DMSO vs. Verapamil              | 0.019    |

**Source Data of Western blot in Supplementary Figures.**

Related to supplementary Fig. 1b

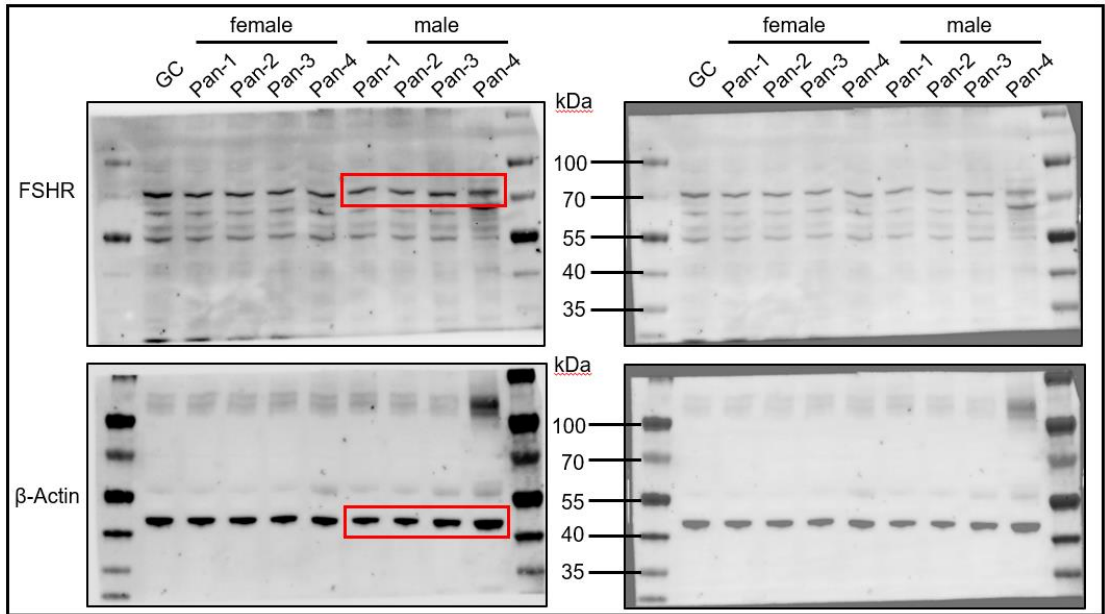

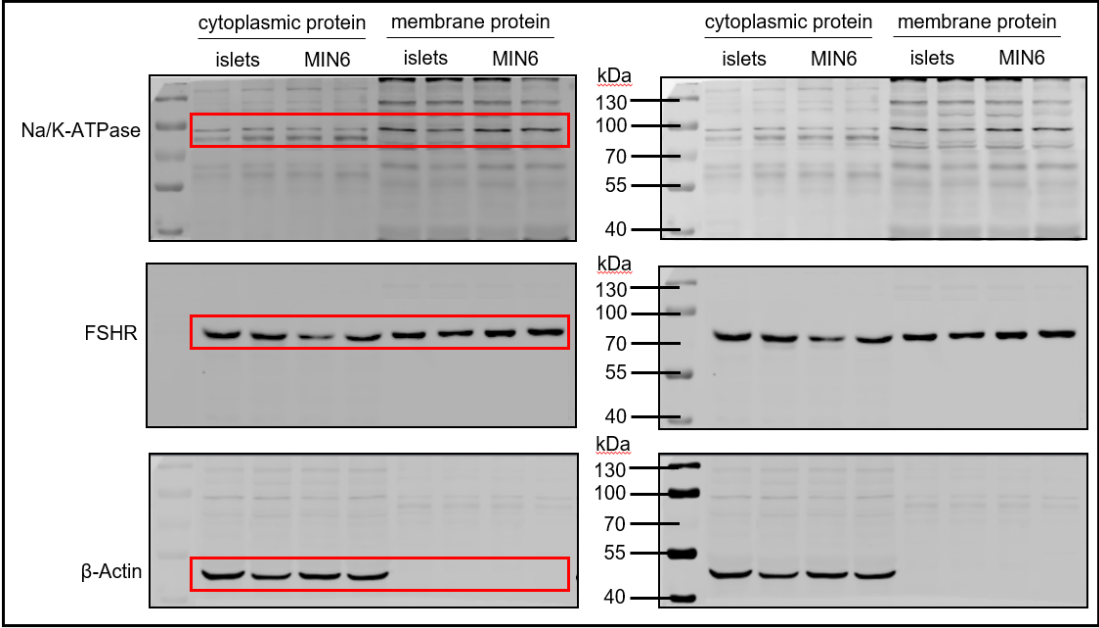

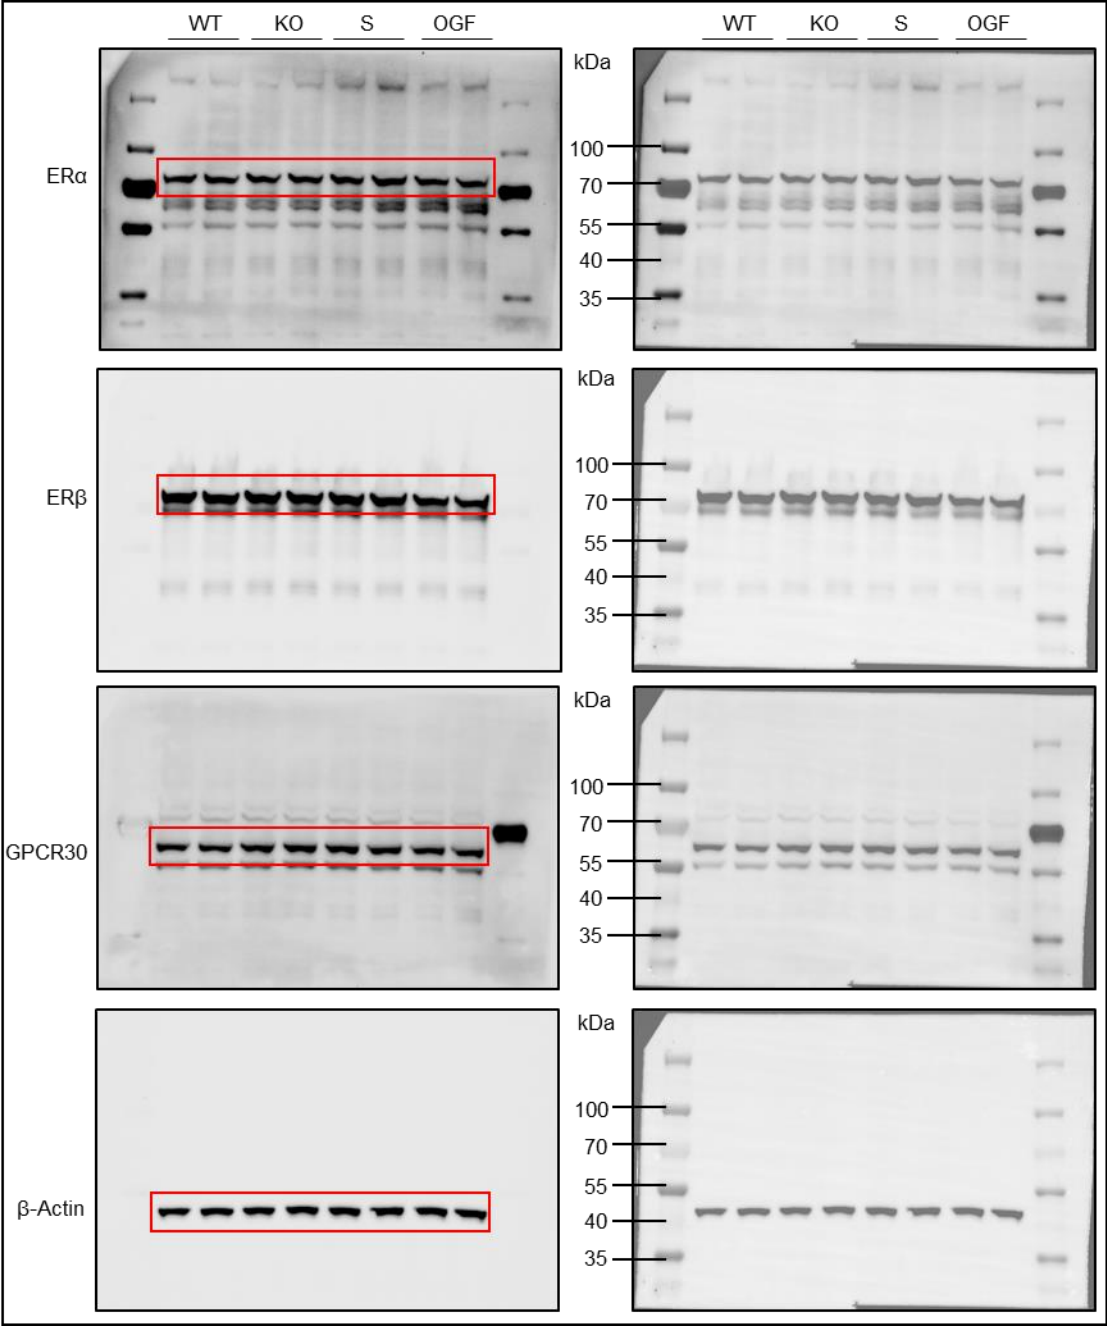



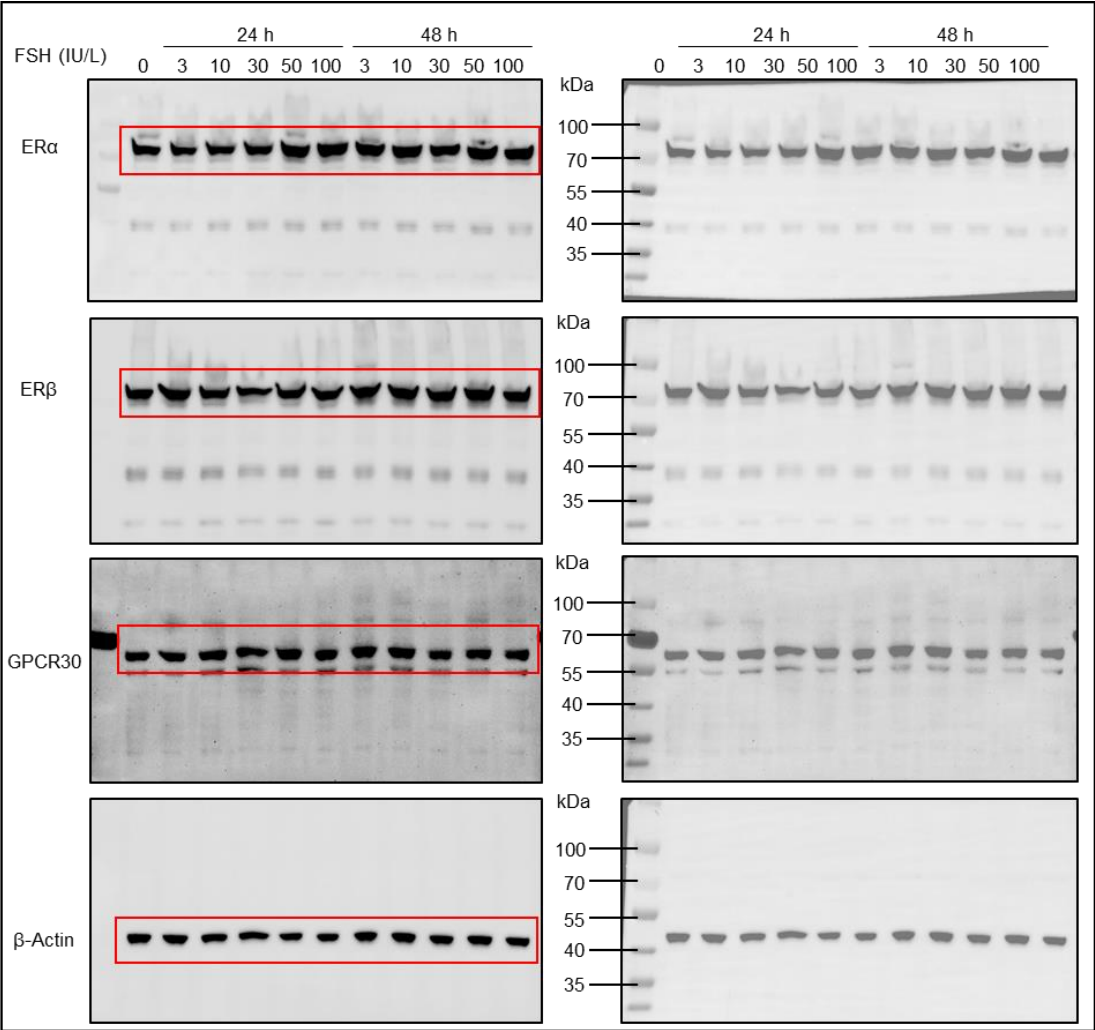

186      Related to supplementary Fig. 12b

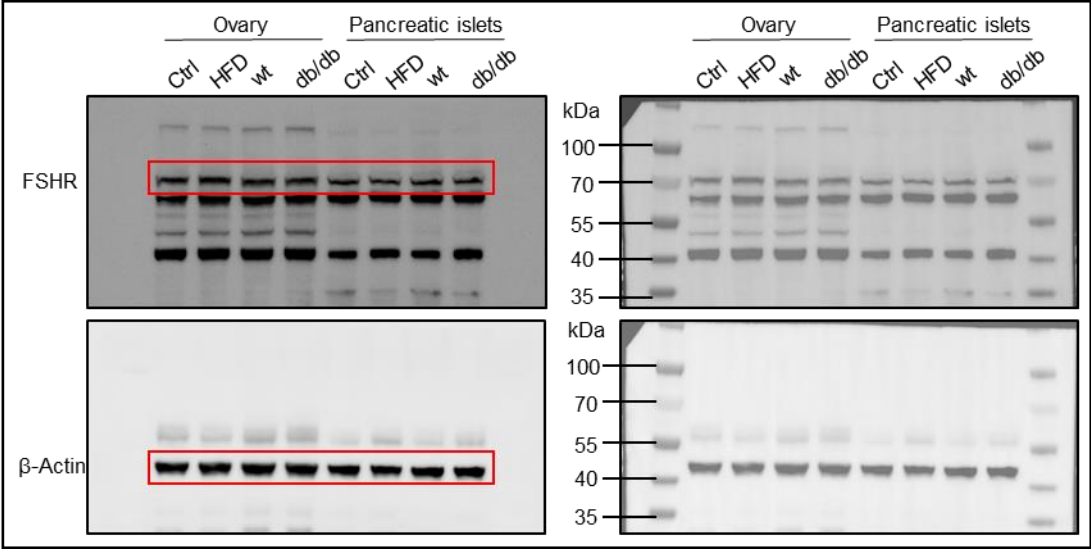

187

188      Related to supplementary Fig. 14a

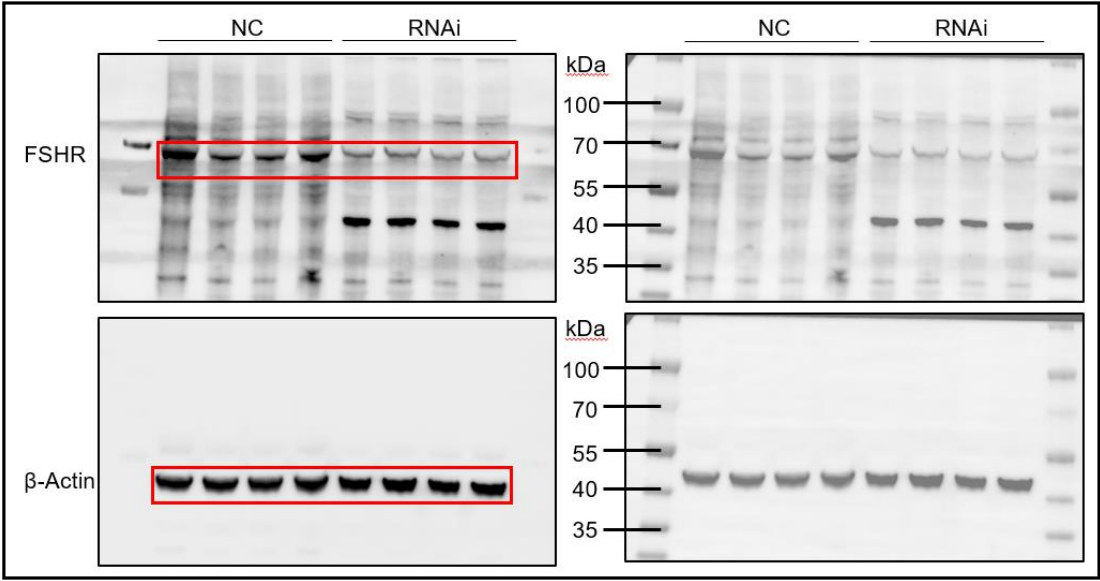

189

190      Related to supplementary Fig. 14f

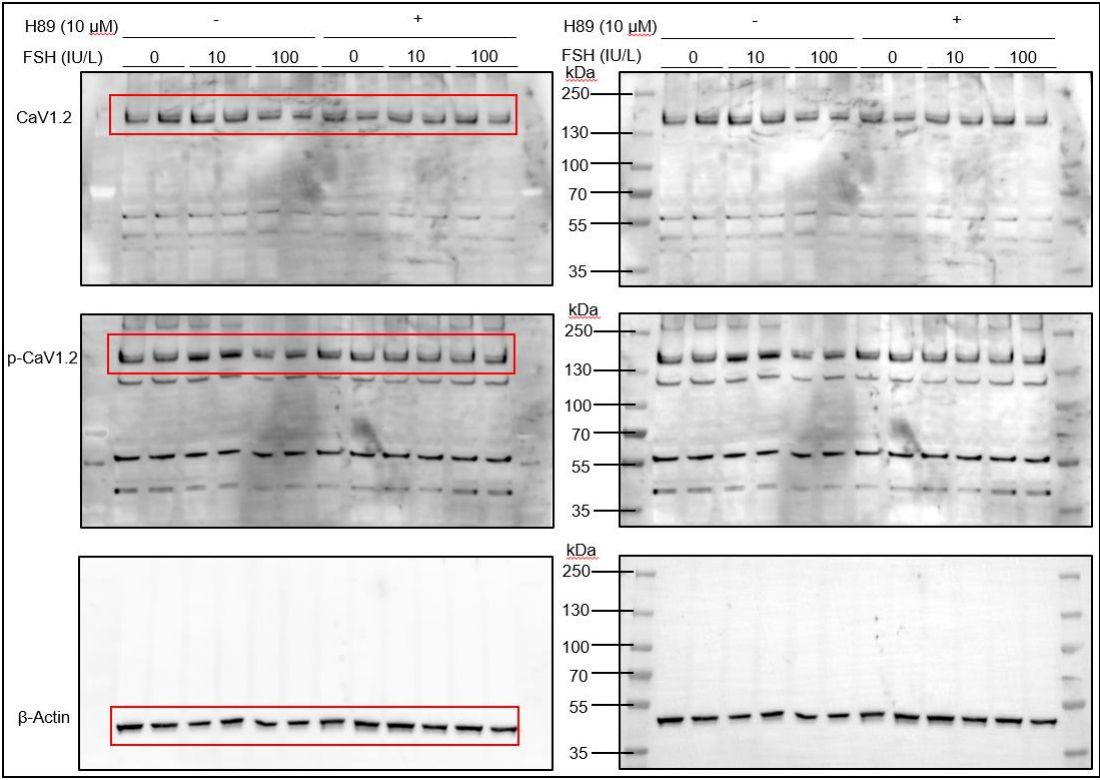

191

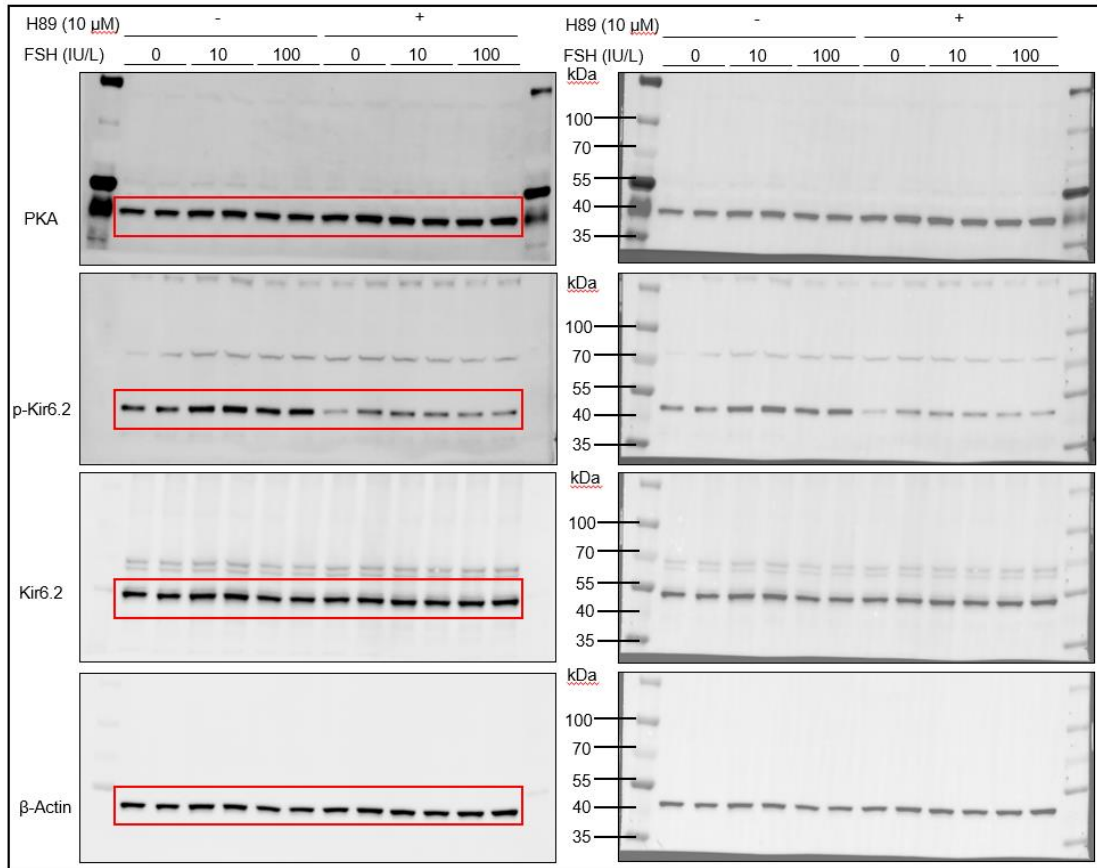

193      Related to supplementary Fig. 15a

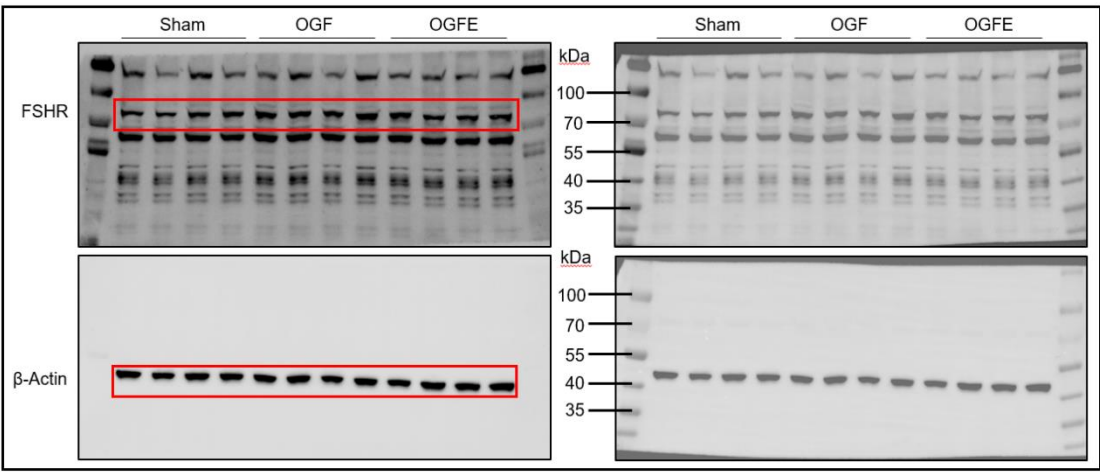

194

195      Related to supplementary Fig. 15b

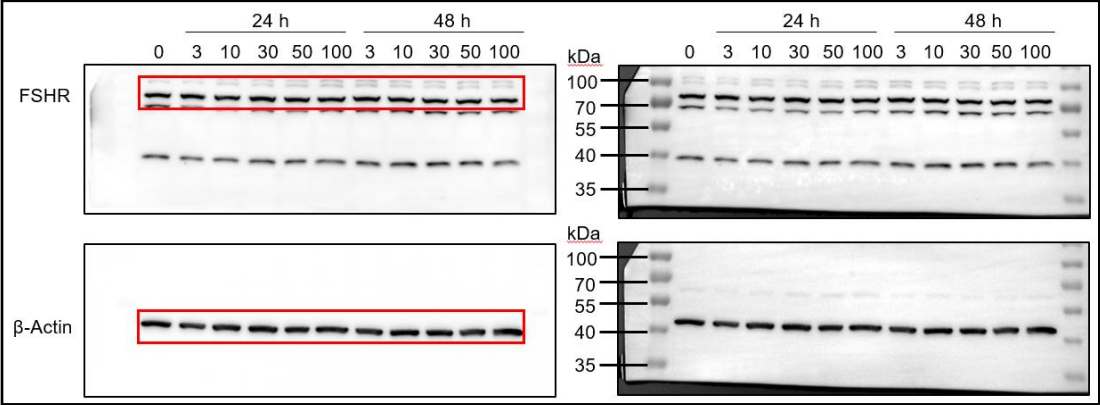

196

197
